# Supplementary material
Source: PubMed Central journal article supplement (PMC11695847)
Supplement: jmcp.2025.31.1.42_s001.pdf [file jmcp.2025.31.1.42_s001.pdf]

## **SUPPLEMENTARY MATERIALS**

### **Geographic atrophy and factors associated with disease progression among Medicare Advantage enrollees**

Vishal Saundankar, BPharm, MS; Mark Borns, PharmD; Kelly Broderick, PharmD; Birva Shah, OD; Stuart Cowburn, MS; Steven McFadden, PharmD; Brandon Suehs, PharmD, PhD

**SUPPLEMENTARY FIGURE 1** Kaplan-Meier Curve Showing Progression to GA With Subfoveal Involvement

**SUPPLEMENTARY FIGURE 2** Kaplan-Meier Curves Showing Fall-Related Injury in GA and Non-GA Cohorts

**SUPPLEMENTARY TABLE 1** Diagnosis Codes for Clinical Outcomes and Comorbidities

**SUPPLEMENTARY TABLE 2** Codes for Diagnostic Imaging

**SUPPLEMENTARY TABLE 3** Baseline Variables Used in Matching

**SUPPLEMENTARY TABLE 4** Treatments Received During Post-Index Period

**SUPPLEMENTARY TABLE 5** Clinical Comorbidities and Outcomes During Post-Index Period

**SUPPLEMENTARY TABLE 6** Factors Associated With Progression From GA Without Subfoveal Involvement to GA With Subfoveal Involvement

**SUPPLEMENTARY TABLE 7** Factors Associated With Progression to Blindness

**SUPPLEMENTARY TABLE 8** All-Cause HCRU During Post-Index Period

**Supplementary Figure 1: Kaplan-Meier curve showing progression to GA with subfoveal involvement**

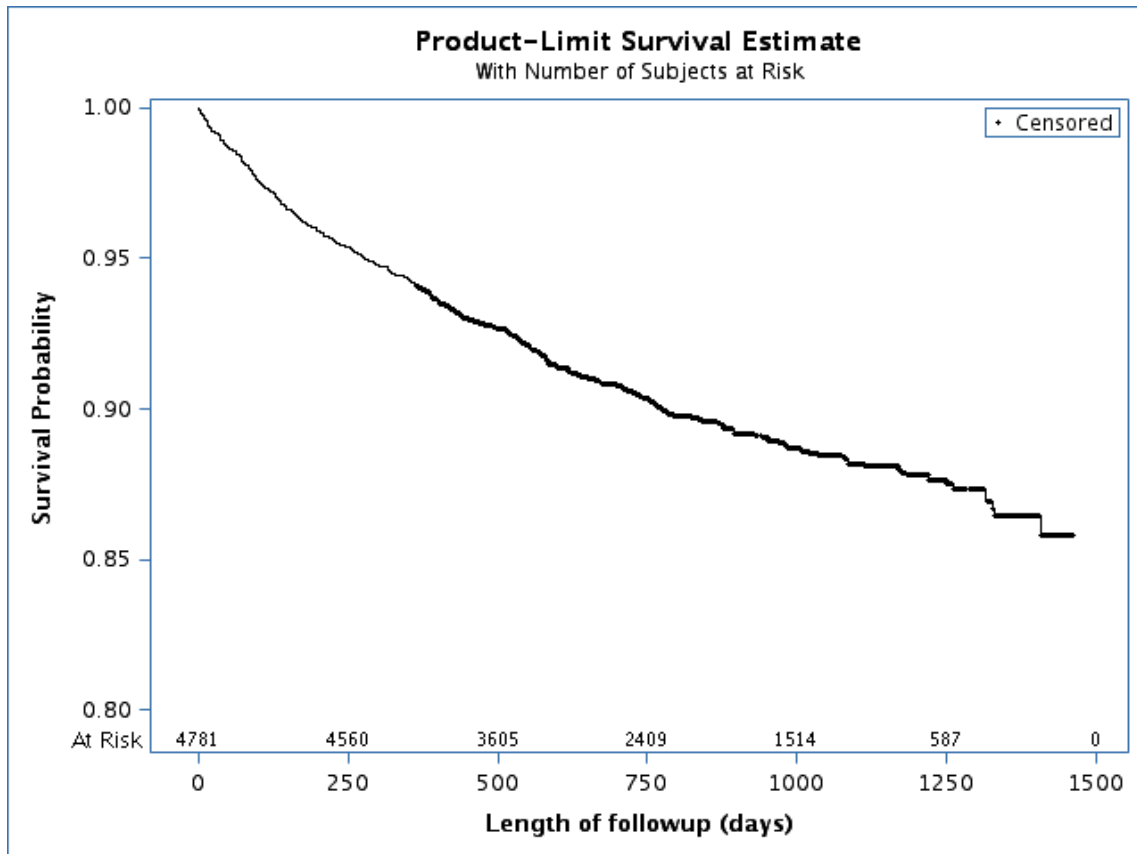

Patients having GA without subfoveal involvement at index ( $n = 4,781$ ) were included in this analysis. The plot has been adjusted to highlight only the survival probabilities between 0.8 and 1.0.

**Supplementary Figure 2: Kaplan-Meier curves showing fall-related injury in GA and non-GA cohorts.**

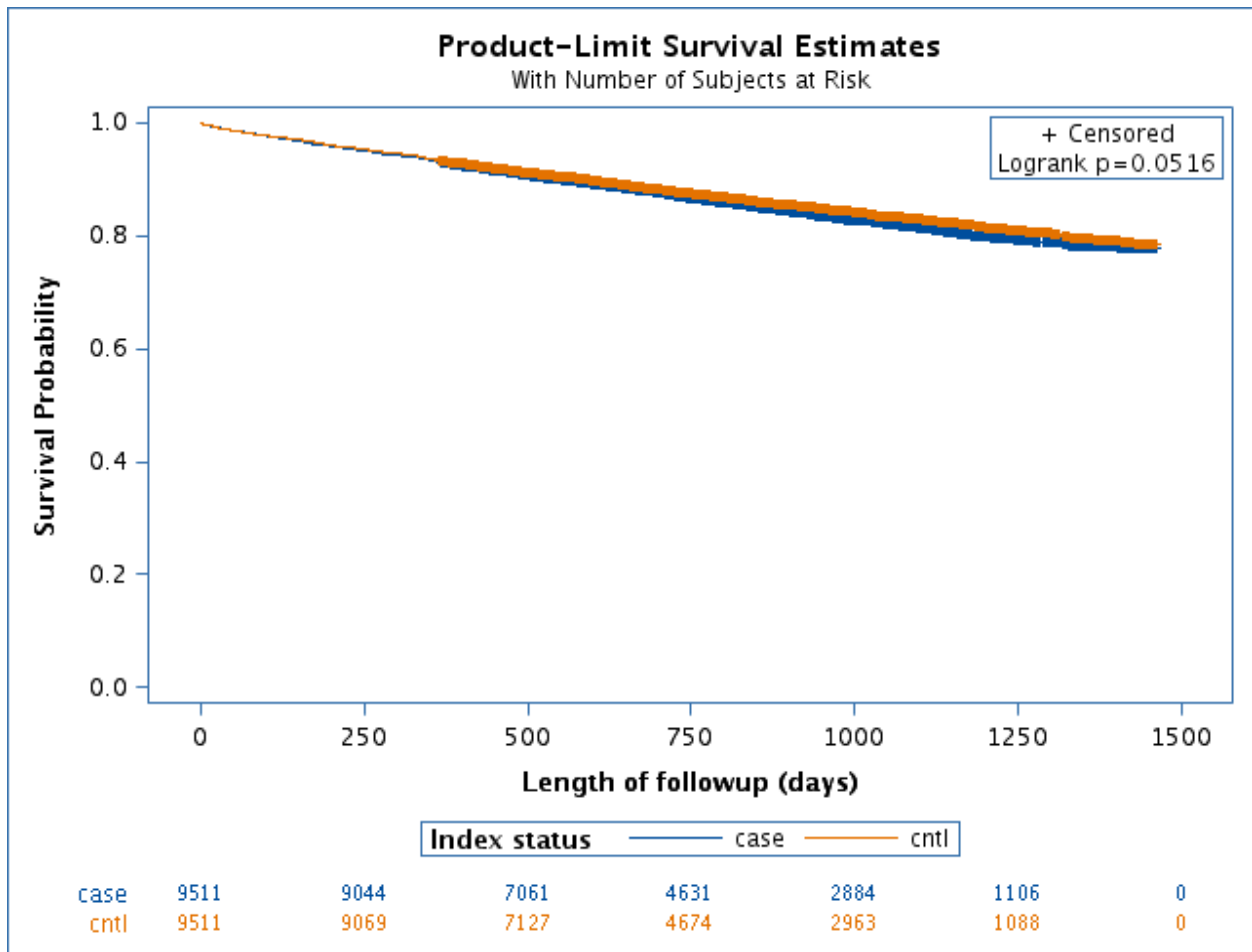

**Supplementary table 1. Diagnosis Codes for Clinical Outcomes and Comorbidities.**

| ICD-10-CM Code                                                                           | Description                                                                                                                                                                                                                                                                                                                                                                                                                                                                                     |
|------------------------------------------------------------------------------------------|-------------------------------------------------------------------------------------------------------------------------------------------------------------------------------------------------------------------------------------------------------------------------------------------------------------------------------------------------------------------------------------------------------------------------------------------------------------------------------------------------|
| <b>Dry AMD</b>                                                                           |                                                                                                                                                                                                                                                                                                                                                                                                                                                                                                 |
| Dry (nonexudative) AMD, early stage                                                      | H35.31x1                                                                                                                                                                                                                                                                                                                                                                                                                                                                                        |
| Dry (nonexudative) AMD, intermediate dry stage                                           | H35.31x2                                                                                                                                                                                                                                                                                                                                                                                                                                                                                        |
| Dry (nonexudative) AMD, advanced atrophic without subfoveal involvement (GA without SFI) | H35.31x3                                                                                                                                                                                                                                                                                                                                                                                                                                                                                        |
| Dry (nonexudative) AMD, advanced atrophic with subfoveal involvement (GA with SFI)       | H35.31x4                                                                                                                                                                                                                                                                                                                                                                                                                                                                                        |
| <b>Wet AMD</b>                                                                           |                                                                                                                                                                                                                                                                                                                                                                                                                                                                                                 |
| Wet (exudative) AMD, with active choroidal neovascularization                            | H35.32x1                                                                                                                                                                                                                                                                                                                                                                                                                                                                                        |
| Wet (exudative) AMD, with inactive choroidal neovascularization                          | H35.32x2                                                                                                                                                                                                                                                                                                                                                                                                                                                                                        |
| Wet (exudative) AMD, inactive scar                                                       | H35.32x3                                                                                                                                                                                                                                                                                                                                                                                                                                                                                        |
| <b>Ophthalmic conditions</b>                                                             |                                                                                                                                                                                                                                                                                                                                                                                                                                                                                                 |
| Wet Age-Related Macular Degeneration                                                     | H35.32x                                                                                                                                                                                                                                                                                                                                                                                                                                                                                         |
| Glaucoma                                                                                 | H40.x, H42                                                                                                                                                                                                                                                                                                                                                                                                                                                                                      |
| Diabetic Retinopathy                                                                     | E10.31x-E10.35x, E11.31x-E11.35x, E13.31-E13.35x                                                                                                                                                                                                                                                                                                                                                                                                                                                |
| Cataract                                                                                 | H25.x, H26.x, H28                                                                                                                                                                                                                                                                                                                                                                                                                                                                               |
| Visual Impairment or Blindness                                                           | H54.x                                                                                                                                                                                                                                                                                                                                                                                                                                                                                           |
| <b>Fall-related injuries</b>                                                             |                                                                                                                                                                                                                                                                                                                                                                                                                                                                                                 |
| Falls                                                                                    | W00.xxxx–W19.xxxx and R29.6                                                                                                                                                                                                                                                                                                                                                                                                                                                                     |
| Fractures                                                                                | S02.x, S12.x, S22.x, S32.x, S42.x, S52.x, S62.x, S72.x, S82.x, S92.x                                                                                                                                                                                                                                                                                                                                                                                                                            |
| Dislocations                                                                             | S03.x, S13.x, S23.x, S33.x, S43.x, S53.x, S63.x, S73.x, S83.x, S93.x                                                                                                                                                                                                                                                                                                                                                                                                                            |
| Head Injuries                                                                            | S00.x-S09.x, except for S00.x6, S00.x7 and S01.x5                                                                                                                                                                                                                                                                                                                                                                                                                                               |
| <b>Comorbidities</b>                                                                     |                                                                                                                                                                                                                                                                                                                                                                                                                                                                                                 |
| Depression                                                                               | F43.21, F94.8, F43.22, F43.23, F43.29, F43.24, F43.25, F43.8, F43.20, F06.30, F30.10, F30.11, F30.12, F30.13, F30.2, F30.3, F30.4, F32.9, F32.0, F32.1, F32.2, F32.3, F32.4, F32.5, F33.9, F33.0, F33.1, F33.2, F33.3, F33.41, F33.42, F31.10, F31.11, F31.12, F31.13, F31.2, F31.73, F31.74, F31.30, F31.31, F31.32, F31.4, F31.5, F31.75, F31.76, F31.60, F31.61, F31.62, F31.63, F31.64, F31.77, F31.78, F31.9, F30.8, F32.89, F31.81, F39, F34.81, F34.89, F34.1, F05, F04, F02.80, F02.81, |

|                                |                                                                                                                                                                                                                      |
|--------------------------------|----------------------------------------------------------------------------------------------------------------------------------------------------------------------------------------------------------------------|
|                                | F03.90, F03.91, F06.0, F06.8, F07.0, F07.81, F48.2, F07.89, F09, G30.9, G31.01, G31.09, G31.1, G31.83, R41.81                                                                                                        |
| Anxiety Disorders              | F40.x, F41.x                                                                                                                                                                                                         |
| Osteoarthritis                 | M15.0x, M15.1x, M15.2x, M15.3x, M15.8x, M15.9x, M16.xx- M19.xx                                                                                                                                                       |
| Uveitis                        | H20.011, H20.012, H20.013, H20.021, H20.022, H20.023, H20.11, H20.12, H20.13, H43.89, H43.89, H30.21, H30.22, H30.23, H30.021, H30.022, H30.023,                                                                     |
|                                | H30.031, H30.032, H30.033, H30.91, H30.92, H30.93, H44.011, H44.012, H44.013, H44.001, H44.002, H44.003, H44.011, H44.012, H44.013, H44.021, H44.022, H44.023, H44.111, H44.112, H44.113, H20.031, H20.032, H20.033, |
|                                | A18.54, B00.51, B02.32, H20.041, H20.042, H20.043                                                                                                                                                                    |
| <b>Ocular surface diseases</b> |                                                                                                                                                                                                                      |
| Dry eye syndrome               | H04.12x                                                                                                                                                                                                              |
| Blepharitis                    | H01.00x, H01.01x, H01.02x                                                                                                                                                                                            |
| Allergies                      | H01.11x, H10.011, H10.012, H10.013, H10.10, H10.11, H10.12, H10.13, H10.45, H11.431, H11.432, H11.433, L29.8x, H04.201, H04.202, H04.203                                                                             |
| Meibomian gland dysfunction    | H02.88                                                                                                                                                                                                               |
| Keratitis                      | H16.x                                                                                                                                                                                                                |
| Conjunctivitis                 | H10.xx, except for H10.10, H10.11, H10.12, H10.13, H10.45                                                                                                                                                            |
| Chemical or thermal burns      | T26.xx                                                                                                                                                                                                               |
| Sjogren's Syndrome             | M35.01                                                                                                                                                                                                               |

*Note values of x in 6<sup>th</sup> position of AMD diagnosis code: 1= right eye, 2= left eye, 3= bilateral, 9= unspecified eye.*

### Supplementary Table 2. Codes for diagnostic imaging

| Imaging modality                    | CPT Code |
|-------------------------------------|----------|
| Optical Coherence Tomography (OCT)  | 92134    |
| Fundus Photography                  | 92250    |
| Fluorescein Angiography (FA)        | 92235    |
| Indocyanine-green angiography (ICG) | 92240    |
| FA & ICF (at same time)             | 92242    |

### Supplementary table 3. Baseline Variables Used in Matching

| Variable                                | Before Matching         |                    |                         | After Matching    |                |                         |
|-----------------------------------------|-------------------------|--------------------|-------------------------|-------------------|----------------|-------------------------|
|                                         | Full (unmatched) sample |                    |                         | Matched sample    |                |                         |
|                                         | GA Cohort               | Non-GA Cohort      | Standardized difference | GA Cohort         | Non-GA Cohort  | Standardized difference |
| N                                       | 9,519                   | 574,783            | .                       | 9,511             | 9,511          |                         |
| <b>Demographic Characteristics</b>      |                         |                    |                         |                   |                |                         |
| Age on index date, mean (SD)            | 82.29<br>(±7.45)        | 74.91 (±6.66)      | 1.05                    | 82.27<br>(±7.42)  | 82.34 (±7.64)  | 0.01                    |
| Index year and month counter, mean (SD) | 17.36<br>(±10.71)       | 18.08 (±10.78)     | 0.07                    | 17.36<br>(±10.71) | 17.46 (±10.71) | 0.01                    |
| <b>Sex</b>                              |                         |                    |                         |                   |                |                         |
| Female                                  | 6,144<br>(64.5%)        | 326,540<br>(56.8%) | 0.16                    | 6,136<br>(64.5%)  | 6,062 (63.7%)  | 0.02                    |
| <b>Race</b>                             |                         |                    |                         |                   |                |                         |
| White                                   | 8,894<br>(93.4%)        | 456,900<br>(79.5%) | 0.42                    | 8,886<br>(93.4%)  | 8,860 (93.2%)  | 0.01                    |
| Black                                   | 192 (2.0%)              | 70,211<br>(12.2%)  | 0.41                    | 192 (2.0%)        | 204 (2.1%)     | 0.01                    |
| Other                                   | 248 (2.6%)              | 26,214 (4.6%)      | 0.11                    | 248 (2.6%)        | 262 (2.8%)     | 0.01                    |
| Unknown                                 | -                       | -                  | -                       | 185 (1.9%)        | 185 (1.9%)     | 0.00                    |
| <b>Geographic location</b>              |                         |                    |                         |                   |                |                         |
| Northeast                               | 300 (3.2%)              | 15,609 (2.7%)      | 0.03                    | 299 (3.1%)        | 336 (3.5%)     | 0.02                    |
| Mid West                                | 2,373<br>(24.9%)        | 108,293<br>(18.8%) | 0.15                    | 2,366<br>(24.9%)  | 2,387 (25.1%)  | 0.01                    |
| South                                   | 5,472<br>(57.5%)        | 380,171<br>(66.1%) | 0.18                    | 5,472<br>(57.5%)  | 5,410 (56.9%)  | 0.01                    |
| West                                    | 1,374<br>(14.4%)        | 70,710<br>(12.3%)  | 0.06                    | 1,374<br>(14.4%)  | 1,378 (14.5%)  | 0.00                    |
| <b>Population Density</b>               |                         |                    |                         |                   |                |                         |
| Urban                                   | 5,573<br>(58.5%)        | 359,383<br>(62.5%) | 0.08                    | 5,566<br>(58.5%)  | 5,483 (57.6%)  | 0.02                    |

| Variable                                   | Before Matching         |                    |                         | After Matching   |               |                         |
|--------------------------------------------|-------------------------|--------------------|-------------------------|------------------|---------------|-------------------------|
|                                            | Full (unmatched) sample |                    |                         | Matched sample   |               |                         |
|                                            | GA Cohort               | Non-GA Cohort      | Standardized difference | GA Cohort        | Non-GA Cohort | Standardized difference |
| Suburban                                   | 2,560<br>(26.9%)        | 145,395<br>(25.3%) | 0.04                    | 2,559<br>(26.9%) | 2,633 (27.7%) | 0.02                    |
| Rural                                      | 1,170<br>(12.3%)        | 54,752 (9.5%)      | 0.09                    | 1,170<br>(12.3%) | 1,192 (12.5%) | 0.01                    |
| Unknown                                    | -                       | -                  | -                       | 216 (2.3%)       | 203 (2.1%)    | 0.01                    |
| <b>Low income subsidy status (Yes)</b>     | 2,127<br>(22.3%)        | 126,135<br>(21.9%) | 0.01                    | 2,121<br>(22.3%) | 2,156 (22.7%) | 0.01                    |
| <b>Dual eligibility status (Yes)</b>       | 1,665<br>(17.5%)        | 95,906<br>(16.7%)  | 0.02                    | 1,659<br>(17.4%) | 1,641 (17.3%) | 0.01                    |
| <b>Clinical Characteristics</b>            |                         |                    |                         |                  |               |                         |
| <b>Baseline Frailty Score</b>              |                         |                    |                         |                  |               |                         |
| Robust (CFI < 0.15)                        | 3,544<br>(37.2%)        | 246,866<br>(42.9%) | 0.12                    | 3,544<br>(37.3%) | 3,407 (35.8%) | 0.03                    |
| Prefrail (0.15 - 0.24)                     | 4,767<br>(50.1%)        | 278,108<br>(48.4%) | 0.03                    | 4,765<br>(50.1%) | 4,851 (51.0%) | 0.02                    |
| Mildly frail (0.25 - 0.34)                 | 1,022<br>(10.7%)        | 43,195 (7.5%)      | 0.11                    | 1,017<br>(10.7%) | 1,073 (11.3%) | 0.02                    |
| Moderate to severely frail ( $\geq 0.36$ ) | 186 (2.0%)              | 6,614 (1.2%)       | 0.07                    | 185 (1.9%)       | 180 (1.9%)    | 0.01                    |
| <b>Elixhauser conditions</b>               |                         |                    |                         |                  |               |                         |
| Alcohol Abuse                              | 108 (1.1%)              | 9,338 (1.6%)       | 0.04                    | 108 (1.1%)       | 106 (1.1%)    | 0.00                    |
| Blood Loss Anemia                          | 139 (1.5%)              | 6,406 (1.1%)       | 0.03                    | 138 (1.5%)       | 143 (1.5%)    | 0.00                    |
| Cardiac Arrhythmia                         | 2,406<br>(25.3%)        | 115,945<br>(20.2%) | 0.12                    | 2,403<br>(25.3%) | 2,524 (26.5%) | 0.03                    |
| Congestive Heart Failure                   | 1,436<br>(15.1%)        | 75,264<br>(13.1%)  | 0.06                    | 1,432<br>(15.1%) | 1,483 (15.6%) | 0.02                    |
| Coagulopathy                               | 340 (3.6%)              | 22,165 (3.9%)      | 0.02                    | 340 (3.6%)       | 362 (3.8%)    | 0.01                    |

| Variable                        | Before Matching         |                 |                         | After Matching |               |                         |
|---------------------------------|-------------------------|-----------------|-------------------------|----------------|---------------|-------------------------|
|                                 | Full (unmatched) sample |                 |                         | Matched sample |               |                         |
|                                 | GA Cohort               | Non-GA Cohort   | Standardized difference | GA Cohort      | Non-GA Cohort | Standardized difference |
| COPD                            | 1,962 (20.6%)           | 117,771 (20.5%) | 0.00                    | 1,959 (20.6%)  | 2,000 (21.0%) | 0.01                    |
| Deficiency Anemia               | 520 (5.5%)              | 30,251 (5.3%)   | 0.01                    | 518 (5.4%)     | 543 (5.7%)    | 0.01                    |
| Depression                      | 1,266 (13.3%)           | 81,709 (14.2%)  | 0.03                    | 1,261 (13.3%)  | 1,314 (13.8%) | 0.02                    |
| Diabetes Mellitus Complicated   | 1,548 (16.3%)           | 109,044 (19.0%) | 0.07                    | 1,548 (16.3%)  | 1,582 (16.6%) | 0.01                    |
| Diabetes Mellitus Uncomplicated | 1,780 (18.7%)           | 121,570 (21.2%) | 0.06                    | 1,780 (18.7%)  | 1,806 (19.0%) | 0.01                    |
| Drug Abuse                      | 182 (1.9%)              | 19,133 (3.3%)   | 0.09                    | 182 (1.9%)     | 178 (1.9%)    | 0.00                    |
| Fluid Electro Disorder          | 901 (9.5%)              | 48,480 (8.4%)   | 0.04                    | 900 (9.5%)     | 896 (9.4%)    | 0.00                    |
| HIV Aids                        | <11 (<0.1%)             | 726 (0.1%)      | 0.03                    | <11 (<0.1%)    | <11 (<0.1%)   | 0.00                    |
| Hypertension Complicated        | 1,779 (18.7%)           | 100,293 (17.4%) | 0.03                    | 1,777 (18.7%)  | 1,818 (19.1%) | 0.01                    |
| Hypertension Uncomplicated      | 6,217 (65.3%)           | 387,038 (67.3%) | 0.04                    | 6,212 (65.3%)  | 6,264 (65.9%) | 0.01                    |
| Hypothyroidism                  | 2,041 (21.4%)           | 106,534 (18.5%) | 0.07                    | 2,040 (21.4%)  | 2,064 (21.7%) | 0.01                    |
| Liver Failure                   | 173 (1.8%)              | 16,786 (2.9%)   | 0.07                    | 173 (1.8%)     | 172 (1.8%)    | 0.00                    |
| Lymphoma                        | 66 (0.7%)               | 5,064 (0.9%)    | 0.02                    | 66 (0.7%)      | 54 (0.6%)     | 0.02                    |
| Metastatic Cancer               | 82 (0.9%)               | 7,148 (1.2%)    | 0.04                    | 82 (0.9%)      | 80 (0.8%)     | 0.00                    |
| Obesity                         | 793 (8.3%)              | 80,541 (14.0%)  | 0.18                    | 793 (8.3%)     | 801 (8.4%)    | 0.00                    |
| Other Neuro Disorder            | 535 (5.6%)              | 30,638 (5.3%)   | 0.01                    | 534 (5.6%)     | 541 (5.7%)    | 0.00                    |
| Paralysis                       | 74 (0.8%)               | 4,482 (0.8%)    | 0.00                    | 74 (0.8%)      | 77 (0.8%)     | 0.00                    |
| Psychoses                       | 39 (0.4%)               | 2,814 (0.5%)    | 0.01                    | 37 (0.4%)      | 45 (0.5%)     | 0.01                    |
| Peptic Ulcer Disease No Bleed   | 71 (0.7%)               | 3,575 (0.6%)    | 0.02                    | 70 (0.7%)      | 73 (0.8%)     | 0.00                    |



| Variable                          | Before Matching         |                 |                         | After Matching |               |                         |
|-----------------------------------|-------------------------|-----------------|-------------------------|----------------|---------------|-------------------------|
|                                   | Full (unmatched) sample |                 |                         | Matched sample |               |                         |
|                                   | GA Cohort               | Non-GA Cohort   | Standardized difference | GA Cohort      | Non-GA Cohort | Standardized difference |
| Pulmonary Circulatory Disorder    | 419 (4.4%)              | 23,308 (4.1%)   | 0.02                    | 417 (4.4%)     | 418 (4.4%)    | 0.00                    |
| Peripheral Vascular Disease       | 1,801 (18.9%)           | 108,615 (18.9%) | 0.00                    | 1,799 (18.9%)  | 1,878 (19.7%) | 0.02                    |
| RA Collagen Disease               | 421 (4.4%)              | 30,743 (5.3%)   | 0.04                    | 421 (4.4%)     | 395 (4.2%)    | 0.01                    |
| Renal Failure                     | 2,064 (21.7%)           | 113,393 (19.7%) | 0.05                    | 2,061 (21.7%)  | 2,159 (22.7%) | 0.03                    |
| Solid Tumor No Metastasis         | 671 (7.0%)              | 49,616 (8.6%)   | 0.06                    | 671 (7.1%)     | 681 (7.2%)    | 0.00                    |
| Valvular Disease                  | 1,007 (10.6%)           | 49,518 (8.6%)   | 0.07                    | 1,005 (10.6%)  | 1,015 (10.7%) | 0.00                    |
| Weight Loss                       | 277 (2.9%)              | 14,131 (2.5%)   | 0.03                    | 276 (2.9%)     | 299 (3.1%)    | 0.01                    |
| <b>Baseline comorbidities</b>     |                         |                 |                         |                |               |                         |
| Anxiety disorders                 | 1,809 (19.0%)           | 113,817 (19.8%) | 0.02                    | 1,807 (19.0%)  | 1,817 (19.1%) | 0.00                    |
| Osteoarthritis                    | 3,431 (36.0%)           | 211,417 (36.8%) | 0.02                    | 3,426 (36.0%)  | 3,542 (37.2%) | 0.03                    |
| Uveitis                           | 29 (0.3%)               | 988 (0.2%)      | 0.03                    | 29 (0.3%)      | 23 (0.2%)     | 0.01                    |
| Dry eye syndrome                  | 601 (6.3%)              | 25,085 (4.4%)   | 0.09                    | 599 (6.3%)     | 627 (6.6%)    | 0.01                    |
| Blepharitis                       | 151 (1.6%)              | 5,885 (1.0%)    | 0.05                    | 151 (1.6%)     | 137 (1.4%)    | 0.01                    |
| Allergies                         | 287 (3.0%)              | 17,191 (3.0%)   | 0.00                    | 287 (3.0%)     | 309 (3.2%)    | 0.01                    |
| Meibomian gland dysfunction       | 24 (0.3%)               | 1,323 (0.2%)    | 0.00                    | 24 (0.3%)      | 24 (0.3%)     | 0.00                    |
| Keratitis                         | 219 (2.3%)              | 8,850 (1.5%)    | 0.06                    | 219 (2.3%)     | 268 (2.8%)    | 0.03                    |
| Conjunctivitis                    | 147 (1.5%)              | 8,087 (1.4%)    | 0.01                    | 147 (1.5%)     | 168 (1.8%)    | 0.02                    |
| Sjögren's Syndrome                | 11 (0.1%)               | 897 (0.2%)      | 0.01                    | 11 (0.1%)      | 12 (0.1%)     | 0.00                    |
| <b>Healthcare Resources Use</b>   |                         |                 |                         |                |               |                         |
| <b>Baseline hospital episodes</b> |                         |                 |                         |                |               |                         |
| 0                                 | 8,050 (84.6%)           | 490,104 (85.3%) | 0.02                    | 8,045 (84.6%)  | 7,981 (83.9%) | 0.02                    |

| Variable                                        | Before Matching         |                    |                         | After Matching   |               |                         |
|-------------------------------------------------|-------------------------|--------------------|-------------------------|------------------|---------------|-------------------------|
|                                                 | Full (unmatched) sample |                    |                         | Matched sample   |               |                         |
|                                                 | GA Cohort               | Non-GA Cohort      | Standardized difference | GA Cohort        | Non-GA Cohort | Standardized difference |
| 1                                               | 1,142<br>(12.0%)        | 64,803<br>(11.3%)  | 0.02                    | 1,140<br>(12.0%) | 1,207 (12.7%) | 0.02                    |
| >1                                              | 327 (3.4%)              | 19,876 (3.5%)      | 0.00                    | 326 (3.4%)       | 323 (3.4%)    | 0.002                   |
| <b>Baseline inpatient length of stay (days)</b> |                         |                    |                         |                  |               |                         |
| 0                                               | 8,050<br>(84.6%)        | 490,104<br>(85.3%) | 0.02                    | 8,045<br>(84.6%) | 7,981 (83.9%) | 0.02                    |
| 1 to 5                                          | 718 (7.5%)              | 43,698 (7.6%)      | 0.00                    | 718 (7.5%)       | 749 (7.9%)    | 0.01                    |
| >5                                              | 751 (7.9%)              | 40,981 (7.1%)      | 0.03                    | 748 (7.9%)       | 781 (8.2%)    | 0.01                    |
| <b>Baseline Emergency department visits</b>     |                         |                    |                         |                  |               |                         |
| 0                                               | 6,721<br>(70.6%)        | 415,209<br>(72.2%) | 0.04                    | 6,715<br>(70.6%) | 6,641 (69.8%) | 0.02                    |
| 1                                               | 1,328<br>(14.0%)        | 78,862<br>(13.7%)  | 0.01                    | 1,328<br>(14.0%) | 1,370 (14.4%) | 0.01                    |
| >1                                              | 1,470<br>(15.4%)        | 80,712<br>(14.0%)  | 0.04                    | 1,468<br>(15.4%) | 1,500 (15.8%) | 0.01                    |
| <b>Baseline physician office visits</b>         |                         |                    |                         |                  |               |                         |
| 0 to 4                                          | 3,389<br>(35.6%)        | 150,501<br>(26.2%) | 0.21                    | 3,382<br>(35.6%) | 3,298 (34.7%) | 0.02                    |
| 5 to 7                                          | 2,209<br>(23.2%)        | 137,893<br>(24.0%) | 0.02                    | 2,209<br>(23.2%) | 2,207 (23.2%) | 0.00                    |
| 8 to 12                                         | 2,207<br>(23.2%)        | 153,500<br>(26.7%) | 0.08                    | 2,207<br>(23.2%) | 2,239 (23.5%) | 0.01                    |
| >12                                             | 1,714<br>(18.0%)        | 132,889<br>(23.1%) | 0.13                    | 1,713<br>(18.0%) | 1,767 (18.6%) | 0.02                    |

SD, standard deviation; AMD, age-related macular degeneration; COPD, Chronic Obstructive Pulmonary Disease; HVI, Human Immunodeficiency Virus; AIDS, Acquired Immunodeficiency Syndrome; RA, Rheumatoid Arthritis.

**Supplementary table 4. Treatments received during post-index period.**

| Treatment                                               | GA Cohort     | Non-GA Cohort | P-value |
|---------------------------------------------------------|---------------|---------------|---------|
| N                                                       | 9,511         | 9,511         |         |
| Anti-VEGF, n (%)                                        |               |               |         |
| Bevacizumab                                             | 961 (10.1%)   | 159 (1.7%)    | <.0001  |
| Ranibizumab                                             | 215 (2.3%)    | 53 (0.6%)     | <.0001  |
| Aflibercept                                             | 455 (4.8%)    | 109 (1.1%)    | <.0001  |
| Brolucizumab                                            | 11 (0.1%)     | <11 (<0.1%)   | 0.013   |
| Laser therapy, n (%)                                    | 464 (4.9%)    | 169 (1.8%)    | <.0001  |
| Mental Health Conditions Treatments                     |               |               |         |
| Typical Antipsychotics, n (%)                           | 37 (0.4%)     | 42 (0.4%)     | 0.573   |
| Atypical Antipsychotics, n (%)                          | 300 (3.2%)    | 309 (3.3%)    | 0.711   |
| Antidepressants                                         |               |               |         |
| Selective serotonin reuptake inhibitors, n (%)          | 1,838 (19.3%) | 1,851 (19.5%) | 0.812   |
| Serotonin and norepinephrine reuptake inhibitors, n (%) | 523 (5.5%)    | 499 (5.3%)    | 0.440   |
| Tricyclic Antidepressants, n (%)                        | 175 (1.8%)    | 198 (2.1%)    | 0.229   |
| Anti-anxiety Treatments, n (%)                          |               |               |         |
| Benzodiazepines                                         | 1,741 (18.3%) | 1,720 (18.1%) | 0.693   |
| Non- benzodiazepines                                    | 506 (5.3%)    | 462 (4.9%)    | 0.147   |
| Diabetes Treatments, n (%)                              |               |               |         |
| Oral anti-diabetics                                     | 1,574 (16.6%) | 1,691 (17.8%) | 0.025   |
| Injectable anti-diabetics                               | 104 (1.1%)    | 102 (1.1%)    | 0.889   |
| Insulins                                                | 470 (4.9%)    | 441 (4.6%)    | 0.325   |

VEGF, vascular endothelial growth factor.

Oral anti-diabetics- Sulfonylureas, Biguanides (Metformin), Thiazolidinediones, Alpha-glucosidase inhibitors, Meglitinides, Dipeptidyl-peptidase 4 (DPP-4) inhibitors, Sodium-glucose co-transporter 2 (SGLT2) inhibitors.

Injectable anti-diabetics- Amylin mimetics, Incretin mimetics (GLP-1 analogs).

**Supplementary table 5. Clinical comorbidities and outcomes during post-index period.**

| Clinical Outcome             | GA Patients   | Non-GA Patients | P-value |
|------------------------------|---------------|-----------------|---------|
| N                            | 9,511         | 9,511           |         |
| Prevalence measures**, n (%) |               |                 |         |
| Depression                   | 2,123 (22.3%) | 2,145 (22.6%)   | 0.702   |
| Anxiety disorders            | 1,948 (20.5%) | 1,865 (19.6%)   | 0.133   |
| Wet AMD                      | 2,805 (29.5%) | 392 (4.1%)      | <.0001  |
| Incidence measures, n (%)    |               |                 |         |
| Fall-related **¥             | 1,393 (14.6%) | 1,303 (13.7%)   | 0.061   |
| Wet AMD <sup>€</sup>         | 1,725 (22.4%) | 133 (1.5%)      | <.0001  |

| Clinical Outcome                                                           | GA Patients   | Non-GA Patients | P-value |
|----------------------------------------------------------------------------|---------------|-----------------|---------|
| Incidence rate of fall-related injuries per 1000 person years <sup>¥</sup> |               |                 |         |
| Individuals contributing events                                            | 1,393         | 1,303           | -       |
| Total Events                                                               | 1,393         | 1,303           | -       |
| Individuals contributing person time                                       | 9,512         | 9,512           | -       |
| Total person time (years)                                                  | 18,645.9      | 18,945.8        | -       |
| Crude incidence rate (per 1000 person year)                                | 74.7          | 68.8            | -       |
| 95% confidence interval                                                    | 70.84 (78.7)  | 65.1 (72.6)     | NS      |
| Incidence of mental health conditions <sup>£</sup> , n (%)                 | 2,274 (23.4%) | 2,144 (22.0%)   | 0.023   |
| Depression <sup>€</sup>                                                    |               |                 |         |
| Individuals contributing events                                            | 1,384         | 1,232           | -       |
| Total Events                                                               | 1,384         | 1,232           | -       |
| Individuals contributing person time                                       | 7,615         | 7,550           | -       |
| Total person time (years)                                                  | 15,983.9      | 15,941.4        | -       |
| Crude incidence rate (per 1000 person year)                                | 86.6          | 77.3            | -       |
| 95% confidence interval                                                    | 82.08 (91.3)  | 73.0 (81.7)     | 0.004   |
| Anxiety disorders <sup>€</sup>                                             |               |                 |         |
| Individuals contributing events                                            | 1,365         | 1,280           | -       |
| Total Events                                                               | 1,365         | 1,280           | -       |
| Individuals contributing person time                                       | 7,705         | 7,695           | -       |
| Total person time (years)                                                  | 16151.7       | 16221.7         | -       |
| Crude incidence rate (per 1000 person year)                                | 84.5          | 78.9            | -       |
| 95% confidence interval                                                    | 80.09 (89.1)  | 74.6 (83.4)     | NS      |

AMD, age-related macular degeneration; LCL, lower confidence level; UCL, upper confidence level; NS, not significant.

\*For falls, fractures and dislocations identified, only initial encounters for the fall episode were included.

For calculating the crude incidence rates, a variable follow up was used and patients were followed up until they disenrolled from insurance or died or until the end of study period.

\*\*Prevalence measures calculated for all patients, regardless of baseline condition status, using 365 days follow up.

¥ Incidence measures calculated using entire follow up period for each patient, censored at first of: event, end of study, end of post-index insurance coverage.

£ Denominator=distinct patients who had no baseline depression or no baseline anxiety (n GA cohort=9734, n non-GA cohort=9748). Numerator=anyone from denominator who had either a depression or anxiety Dx (or both) in full follow up period.

€ Incidence measures calculated using entire follow up period for each patient who did not have the condition at baseline, censored at first of: event, end of study, end of post-index insurance coverage.

### **Supplementary Table 6. Factors Associated with Progression from GA Without Subfoveal Involvement to GA With Subfoveal Involvement**

| Variable                        | Hazard Ratio | 95% confidence limit |       | P-value |
|---------------------------------|--------------|----------------------|-------|---------|
|                                 |              | LCL                  | UCL   |         |
| Age Category (Ref= 65-74)       |              |                      |       |         |
| 75-84                           | 1.015        | 0.772                | 1.35  | 0.9184  |
| ≥85                             | 0.977        | 0.74                 | 1.305 | 0.8714  |
| Male (Ref= Female)              | 0.947        | 0.782                | 1.144 | 0.5779  |
| Race (Ref= White)               |              |                      |       |         |
| Black                           | 1.068        | 0.549                | 1.858 | 0.8304  |
| Other                           | 0.693        | 0.331                | 1.262 | 0.2777  |
| Unknown                         | 0.679        | 0.241                | 1.483 | 0.3934  |
| Population Density (Ref= Urban) |              |                      |       |         |
| Suburban                        | 0.774        | 0.618                | 0.961 | 0.0227  |
| Rural                           | 0.766        | 0.563                | 1.02  | 0.0774  |
| Unknown                         | 0.997        | 0.543                | 1.669 | 0.9926  |
| Elixhauser Score (Ref= 0 -1)    |              |                      |       |         |
| 2 - 3                           | 1.200        | 0.945                | 1.528 | 0.1361  |
| 4 - 5                           | 1.459        | 1.116                | 1.906 | 0.0056  |
| 5+                              | 1.392        | 1.021                | 1.889 | 0.0347  |
| Baseline comorbidities          |              |                      |       |         |
| Wet AMD                         | 5.702        | 4.633                | 6.998 | <.0001  |
| Pre-index Anti-VEGF use         | 0.791        | 0.605                | 1.028 | 0.0827  |
| Healthcare resource use         |              |                      |       |         |
| Inpatient stay                  | 0.803        | 0.594                | 1.071 | 0.1441  |
| ER visit                        | 0.928        | 0.749                | 1.142 | 0.4841  |
| Telehealth visit                | 0.761        | 0.551                | 1.026 | 0.0845  |

AMD, age-related macular degeneration; VEGF, vascular endothelial growth factor.  
Note that this model only included the subgroup of patients with GA without SFI at index (n=4,781).

**Supplementary Table 7. Factors Associated with Progression to Blindness.**

| Variable                                         | Hazard Ratio | 95% confidence limit |        | P-value |
|--------------------------------------------------|--------------|----------------------|--------|---------|
|                                                  |              | LCL                  | UCL    |         |
| Patient group (Ref= Non-GA Patients)             |              |                      |        |         |
| Patients having GA without subfoveal involvement | 6.765        | 4.981                | 9.35   | <.0001  |
| Patients having GA with subfoveal involvement    | 12.593       | 9.432                | 17.164 | <.0001  |
| Age Category (Ref= 65-74)                        |              |                      |        |         |
| 75-84                                            | 1.027        | 0.794                | 1.343  | 0.8419  |

| Variable                        | Hazard Ratio | 95% confidence limit |       | P-value |
|---------------------------------|--------------|----------------------|-------|---------|
|                                 |              | LCL                  | UCL   |         |
| ≥85                             | 1.273        | 0.988                | 1.66  | 0.0674  |
| Male (Ref= Female)              | 0.893        | 0.743                | 1.069 | 0.2216  |
| Race (Ref= White)               |              |                      |       |         |
| Black                           | 1.164        | 0.618                | 1.978 | 0.606   |
| Other                           | 0.856        | 0.455                | 1.449 | 0.5952  |
| Unknown                         | 0.938        | 0.369                | 1.93  | 0.8766  |
| Population Density (Ref= Urban) |              |                      |       |         |
| Suburban                        | 0.914        | 0.745                | 1.114 | 0.3799  |
| Rural                           | 0.92         | 0.69                 | 1.206 | 0.5594  |
| Unknown                         | 0.637        | 0.289                | 1.199 | 0.2075  |
| Elixhauser Score (Ref= 0 -1)    |              |                      |       |         |
| 2 - 3                           | 1.022        | 0.816                | 1.28  | 0.8508  |
| 4 - 5                           | 1.182        | 0.915                | 1.523 | 0.1971  |
| 5+                              | 1.221        | 0.92                 | 1.613 | 0.1634  |
| Baseline comorbidities          |              |                      |       |         |
| Wet AMD                         | 1.125        | 0.858                | 1.454 | 0.3797  |
| Pre-index Anti-VEGF use         | 0.995        | 0.68                 | 1.441 | 0.9789  |
| Healthcare resource use         |              |                      |       |         |
| Inpatient stay                  | 1.051        | 0.809                | 1.354 | 0.7068  |
| ED visit                        | 1.031        | 0.849                | 1.246 | 0.7576  |
| Telehealth visit                | 0.972        | 0.714                | 1.294 | 0.8491  |

GA, geographic atrophy; Ref, reference level; AMD, age-related macular degeneration; VEGF, vascular endothelial growth factor; ED, emergency department.

**Supplementary Table 8. All-cause Healthcare Resource Utilization (HCRU) During Post-index Period.**

| All-cause HCRU | GA Patients |      | Non-GA Patients |      | P-value |
|----------------|-------------|------|-----------------|------|---------|
| N              | 9511        | 100% | 9511            | 100% |         |

| All-cause HCRU                                  | GA Patients |       | Non-GA Patients |       | P-value |
|-------------------------------------------------|-------------|-------|-----------------|-------|---------|
| Inpatient Stays, n (%)                          | 1641        | 17.3% | 1624            | 17.1% | 0.744   |
| mean (SD)                                       | 0.2         | 0.6   | 0.2             | 0.6   |         |
| median                                          | 0           | -     | 0               | -     | 0.744   |
| 25th, 75th                                      | 0           | 0     | 0               | 0     |         |
| min, max                                        | 0           | 10    | 0               | 8     |         |
| Length of Stay (LOS)                            |             |       |                 |       |         |
| Total LOS during post-index period              |             |       |                 |       |         |
| mean (SD)                                       | 1.6         | 5.7   | 1.6             | 5.7   |         |
| median                                          | 0           | -     | 0               | -     | 0.707   |
| 25th, 75th                                      | 0           | 0     | 0               | 0     |         |
| min, max                                        | 0           | 167   | 0               | 181   |         |
| LOS per hospitalization                         |             |       |                 |       |         |
| mean (SD)                                       | 1.1         | 3.5   | 1.1             | 3.6   |         |
| median                                          | 0           | -     | 0               | -     | 0.707   |
| 25th, 75th                                      | 0           | 0     | 0               | 0     |         |
| min, max                                        | 0           | 81    | 0               | 98    |         |
| LOS per hospitalization (patients with IP stay) |             |       |                 |       |         |
| mean (SD)                                       | 6.6         | 6.0   | 6.5             | 6.4   |         |
| median                                          | 5           | -     | 5               | -     | 0.638   |
| 25th, 75th                                      | 3           | 8     | 3               | 7     |         |
| min, max                                        | 1           | 81    | 1               | 98    |         |
| Emergency Department visits, n (%)              |             |       |                 |       |         |
| mean (SD)                                       | 3068        | 32.3% | 3045            | 32.0% | 0.721   |
| median                                          | 0.8         | 1.8   | 0.8             | 1.8   |         |
| 25th, 75th                                      | 0           | -     | 0               | -     | 0.793   |
| min, max                                        | 0           | 1     | 0               | 1     |         |
| min, max                                        | 0           | 25    | 0               | 27    |         |
| Outpatient visits, n (%)                        |             |       |                 |       |         |
| mean (SD)                                       | 9476        | 99.6% | 9408            | 98.9% | <.0001  |
| median                                          | 18.3        | 15.9  | 16.7            | 15.9  |         |
| 25th, 75th                                      | 15          | -     | 13              | -     | <.0001  |
| min, max                                        | 9           | 23    | 7               | 22    |         |
| min, max                                        | 0           | 332   | 0               | 324   |         |
| Telehealth Services, n (%)                      |             |       |                 |       |         |
| mean (SD)                                       | 2103        | 22.1% | 2128            | 22.4% | 0.663   |
| median                                          | 0.5         | 1.3   | 0.5             | 1.7   |         |
| 25th, 75th                                      | 0           | -     | 0               | -     | 0.527   |
| min, max                                        | 0           | 0     | 0               | 0     |         |
| min, max                                        | 0           | 25    | 0               | 92    |         |

HCRU, healthcare resource use; GA, geographic atrophy; SD, standard deviation; min, minimum; max, maximum; IP, inpatient.

Note that the study period includes Covid-19 pandemic, so the HCRU could have been lower during 2020 and part of 2021.
